# Supplementary material
Source: PubMed Central journal article supplement (PMC4522367)
Supplement: NIHMS707391-supplement-supplement_1.pdf [file NIHMS707391-supplement-supplement_1.pdf]

## SUPPLEMENTAL TABLE 1

Unadjusted and adjusted risk ratios for the association between insurance mandate status and ET practices and perinatal outcomes among ART deliveries resulting from fresh ETs.

| Variable                      | Unadjusted risk ratio | All maternal ages |                                  | 95% CI      |
|-------------------------------|-----------------------|-------------------|----------------------------------|-------------|
|                               |                       | 95% CI            | Adjusted risk ratio <sup>a</sup> |             |
| eSET                          |                       |                   |                                  |             |
| <35 y                         | 0.20                  | (0.12–0.33)       | 0.12                             | (0.07–0.20) |
| ≥35 y                         | 0.38                  | (0.23–0.63)       | 0.22                             | (0.14–0.34) |
| ≥3 embryos transferred        |                       |                   |                                  |             |
| <35 y                         | 3.42                  | (2.24–5.20)       | 4.05                             | (2.62–6.26) |
| ≥35 y                         | 1.08                  | (0.79–1.47)       | 1.41                             | (1.13–1.76) |
| Twins                         | 1.23                  | (1.15–1.32)       | 1.17                             | (1.09–1.25) |
| Triplet or higher order birth | 2.33                  | (1.70–3.21)       | 2.51                             | (1.17–5.39) |
| Preterm delivery              | 1.38                  | (1.26–1.52)       | 1.24                             | (1.13–1.37) |
| Very preterm delivery         | 1.79                  | (1.45–2.20)       | 1.61                             | (1.27–2.04) |
| Low birth weight              | 1.34                  | (1.24–1.46)       | 1.22                             | (1.09–1.37) |
| Very low birth weight         | 1.59                  | (1.27–1.99)       | 1.31                             | (1.06–1.61) |
| Good perinatal outcome        | 0.86                  | (0.83–0.89)       | 0.88                             | (0.84–0.92) |

Note: The mandate state was the referent for all comparisons.

<sup>a</sup> All models adjusted for age, race, education, parity, prior ART cycles, infertility diagnosis, use of assisted hatching, number of embryos cryopreserved, ART type (donor, nondonor) year of birth, embryo stage, and use of ICSI. The models for eSET and ≥3 embryos transferred also included the interaction of mandate status and age.

Boulet. Insurance and ART. *Fertil Steril* 2015.
